# Supplementary material for: Characterization of Zika Virus Endocytic Pathways in Human Glioblastoma Cells
Source: PubMed Central journal article supplement (PMC7069030; doi:10.3389/fmicb.2020.00242), 2020-03-06
Supplement: Data_Sheet_1.pdf [file Data_Sheet_1.pdf]

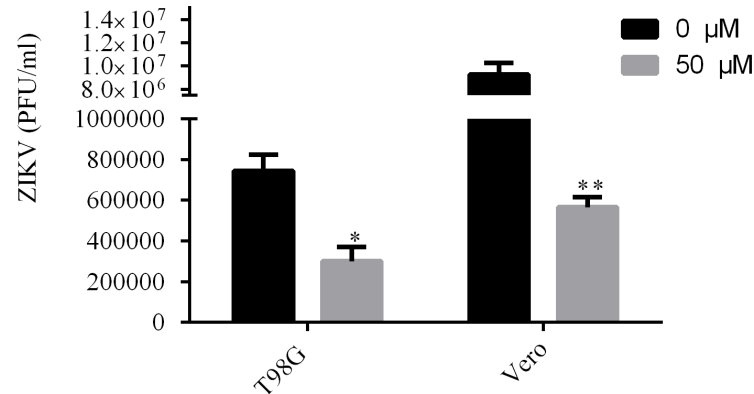

**Supplementary Figure 1.** ZIKV infection is more efficient in Vero cells than in T98G cells. Following treatment with 50  $\mu\text{M}$  chloroquine, T98G and Vero cells were infected with ZIKV at an MOI of 5. At 48 h post-infection, the titers of supernatant viruses were determined by plaque assay. Data shown are mean  $\pm$  SD of two independent experiments with each condition performed in triplicate. \* $P < 0.05$ ; \*\* $P < 0.01$ .

A

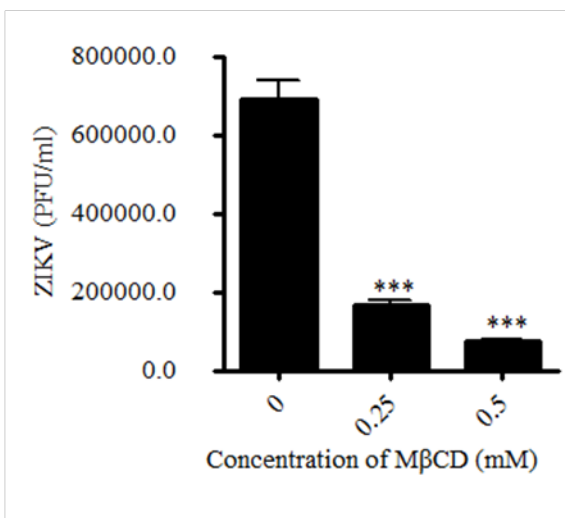

B

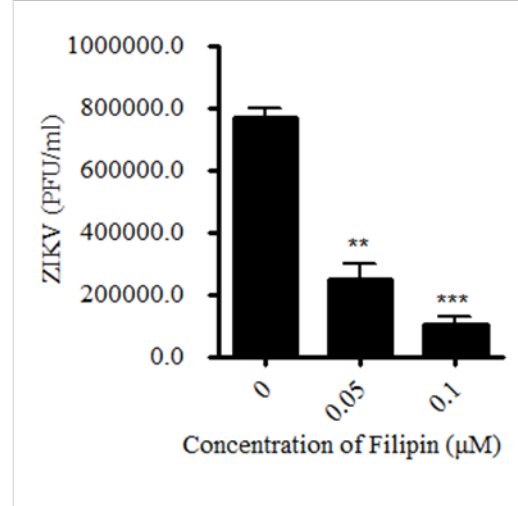

**Supplementary Figure 2.** M $\beta$ CD (A) and filipin (B) are virucidal to ZIKV. ZIKV was treated with increasing concentrations of M $\beta$ CD or filipin for 1 h. The treated ZIKV was chilled, and diluted 100-fold before used for infection. ZIKV infectivity was determined by plaque assay. Data shown are mean  $\pm$  SD of two independent experiments with each condition performed in triplicate. \*\*P < 0.01; \*\*\*P < 0.001.

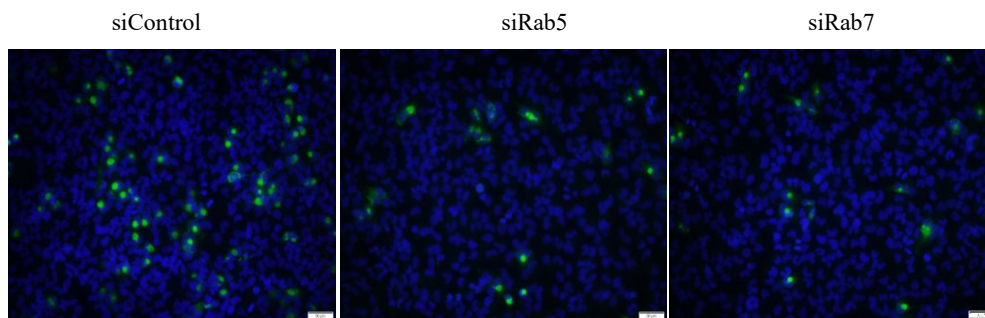

**Supplementary Figure 3.** ZIKV appears to be much less in Rab5 or Rab7-silenced cells. Cells were transfected with Rab5, Rab7 or control siRNAs for 24 h, and then infected with ZIKV at an MOI of 10. At 1 h post-infection at 37°C, cells were washed with PBS (pH=3.0) to remove unbound viruses on the cell surface. At 24 h post-infection, cells were fixed and stained with an anti-ZIKV envelope antibody (green). Scale bars in all panels represent 50  $\mu$ m.
